# Supplementary material for: Neutrophil-specific Shp1 loss results in lethal pulmonary hemorrhage in mouse models of acute lung injury
Source: PubMed Central journal article supplement (PMC11645157; doi:10.1172/jci183161), 2024-10-01
Supplement: jci-134-183161-s203.pdf [file jci-134-183161-s203.pdf]

## Supplementary Data

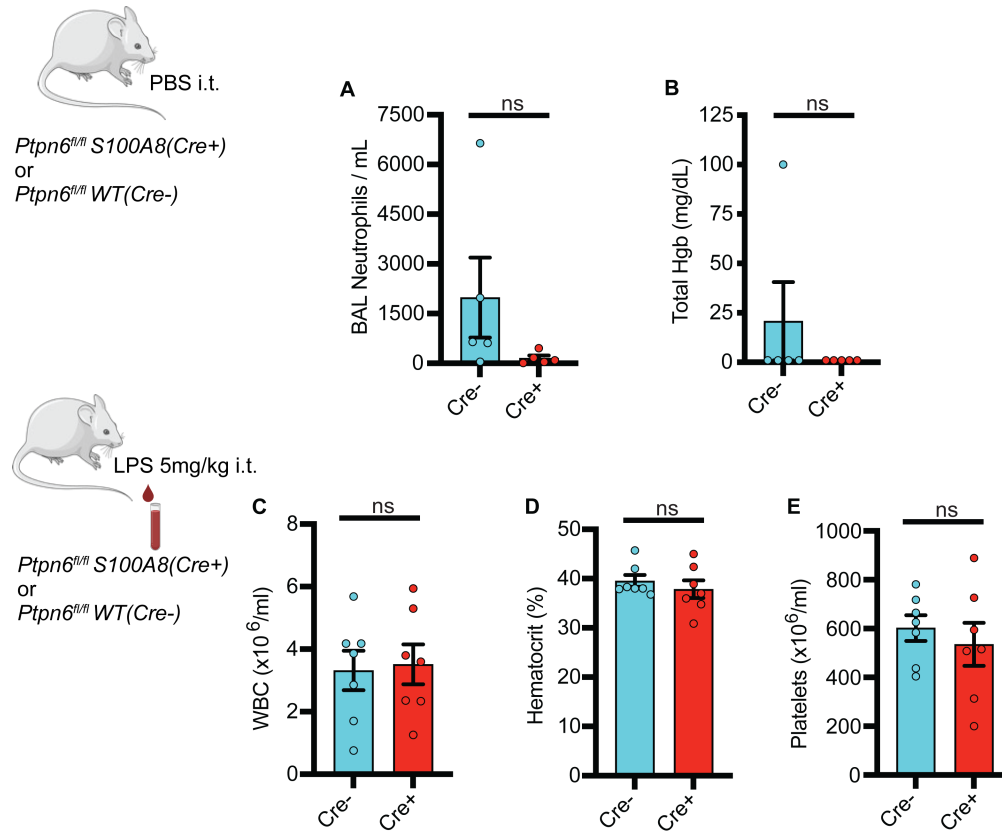

**Supplemental Figure 1. Baseline BAL fluid analysis after PBS instillation and peripheral blood counts after LPS instillation.** Similar (A) alveolar inflammation and lack of (B) alveolar hemorrhage in *Ptpn6<sup>fl/fl</sup>* and *Ptpn6<sup>fl/fl</sup> S100A8(Cre+)* 48 hours after intra-tracheal PBS instillation. Similar (C) blood WBCs, (D) hematocrit, and (E) blood platelet counts, 48 hours after intra-tracheal LPS instillation in *Ptpn6<sup>fl/fl</sup>* and *Ptpn6<sup>fl/fl</sup> S100A8(Cre+)*. Comparison by unpaired two-tailed t-tests on log<sub>10</sub>-transformed data (A-E).

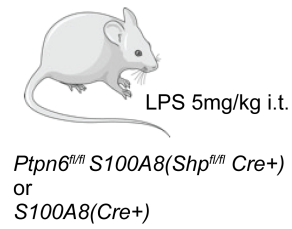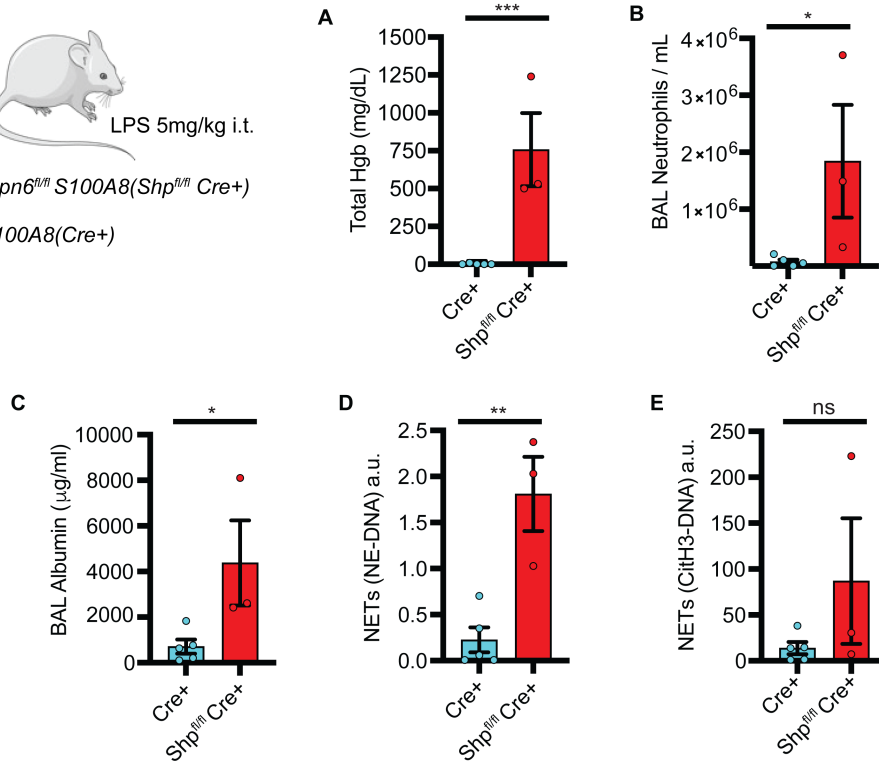

**Supplemental Figure 2. LPS-induced lung hyperinflammation in *S100A8(Cre+)* vs. *Ptpn6<sup>fl/fl</sup> S100A8(Cre+)* mice. (A) Alveolar hemorrhage, (B) BAL neutrophils, (C) BAL albumin, (D) BAL NE-DNA NETs, (E) and BAL CitH3-DNA NETs are reduced in *S100A8(Cre+)* vs. *Ptpn6<sup>fl/fl</sup> S100A8(Cre+)* mice after LPS challenge. \*\*\*\* $p < 0.0001$ , \*\* $p < 0.01$ , \* $p < 0.05$ .**

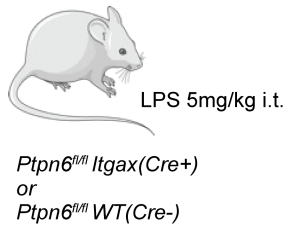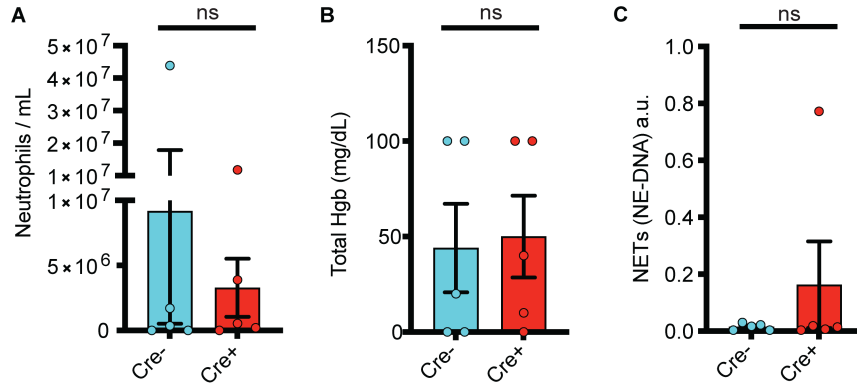

**Supplemental Figure 3. Similar LPS induced lung inflammation with the loss of Shp1 in alveolar macrophages and dendritic cells.** Comparable alveolar (A) neutrophilia, (B) hemorrhage and (C) NETs in *Ptpn6<sup>fl/fl</sup> Itgax(Cre<sup>+</sup>)* vs. *Ptpn6<sup>fl/fl</sup>* mice. Comparison by unpaired two-tailed t-tests on log<sub>10</sub>-transformed data (A-C).

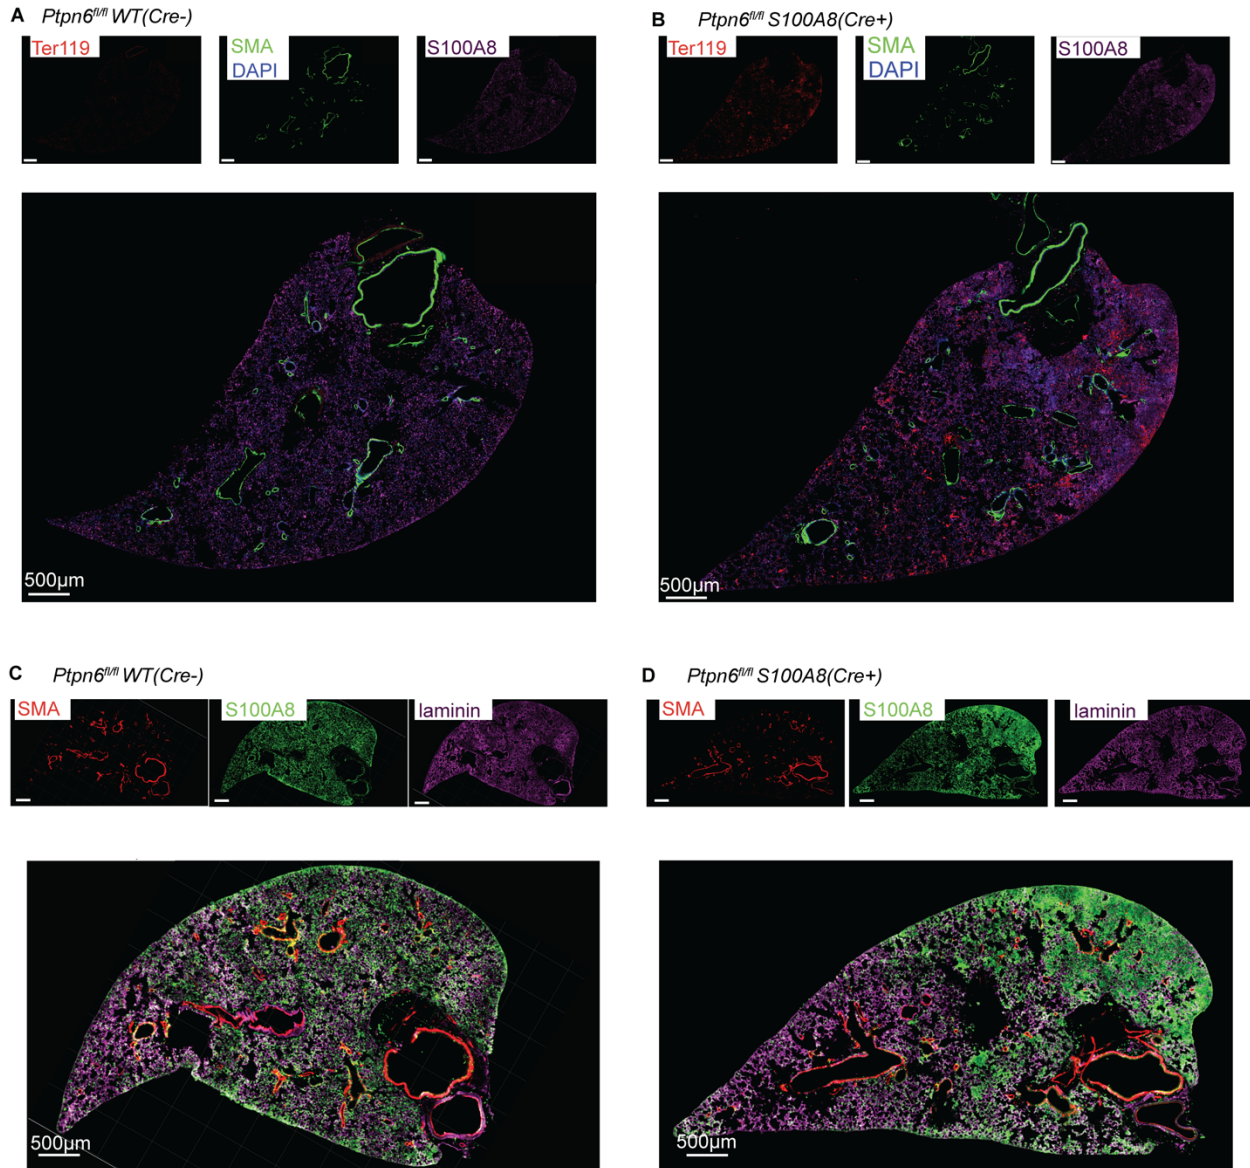

**Supplemental Figure 4. Diffuse neutrophilia and parenchymal hemorrhage with the loss of neutrophil Shp1.** Immunofluorescence imaging of lung tissue with staining for S100A8 (neutrophils), Ter119 (red blood cells), laminin, and smooth muscle actin (SMA) at 48 hours after LPS challenge from (A,C) *Ptpn6<sup>fl/fl</sup>* and (B,D) *Ptpn6<sup>fl/fl</sup> S100A8(Cre+)* and showing increased tissue neutrophils and red blood cell stains in mice with neutrophil Shp1 deletion.

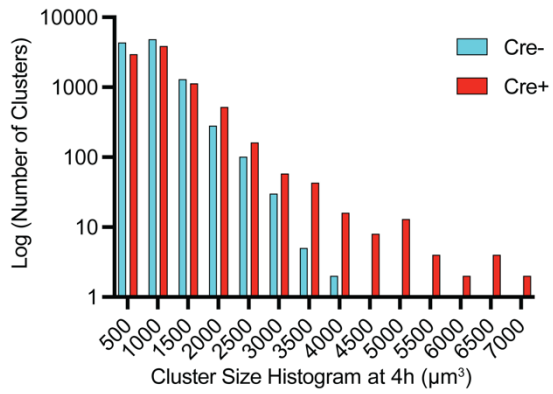

**Supplemental Figure 5. Intravascular neutrophil clusters 4h after intratracheal LPS instillation.** Quantification of intravital lung imaging showing increased numbers and size of intravascular neutrophil clusters 4h after LPS instillation with the loss of Shp1 in neutrophils.

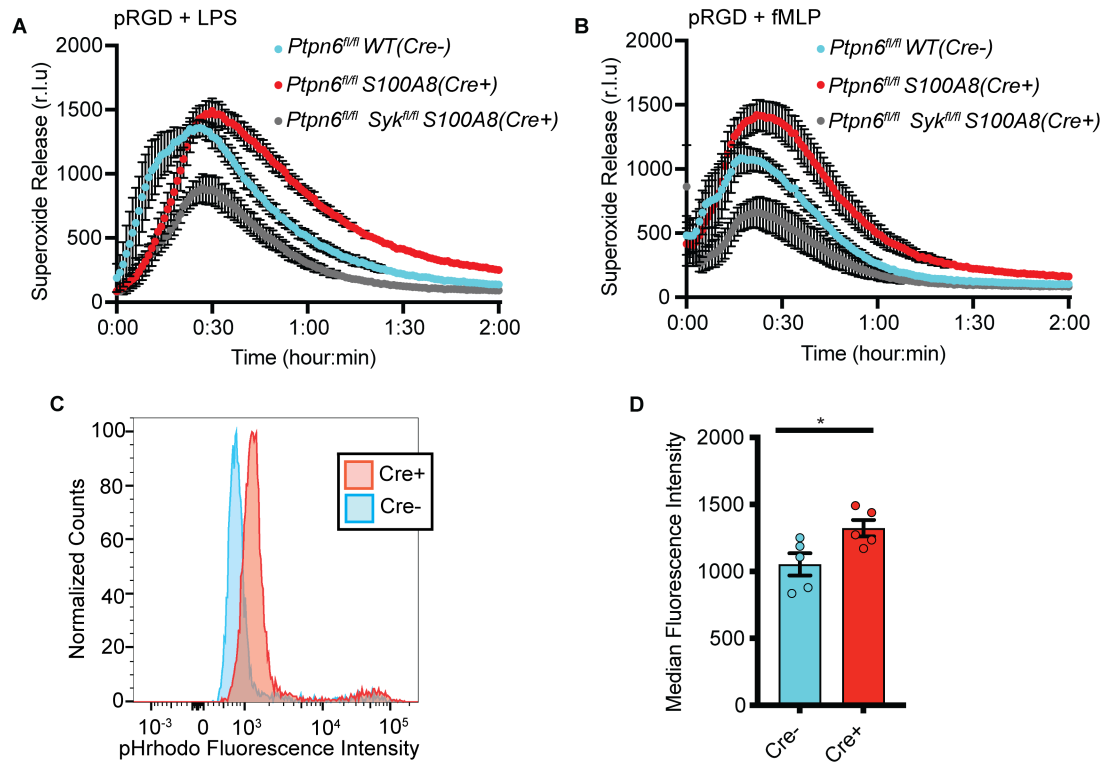

**Supplemental Figure 6. Increased agonist induced reactive oxygen species (ROS) production and increased phagocytosis of pH-Rhodamine-labelled zymosan particles in Shp1 knockout neutrophils. (A)** LPS and **(B)** fMLP induced ROS production on RGD-coated surfaces in  $Ptpn6^{fl/fl}$  S100A8(Cre+) neutrophils is dependent on Syk kinase signaling. **(C)** Sample fluorescence curve with **(D)** increased mean fluorescence intensity of pH-Rhodamine zymosan particles indicating increased fluorescence in Shp1 knockout neutrophils (n=5 mice). *P* values are from unpaired two-tailed t-tests on log<sub>10</sub>-transformed data (F). \**p*<0.05.

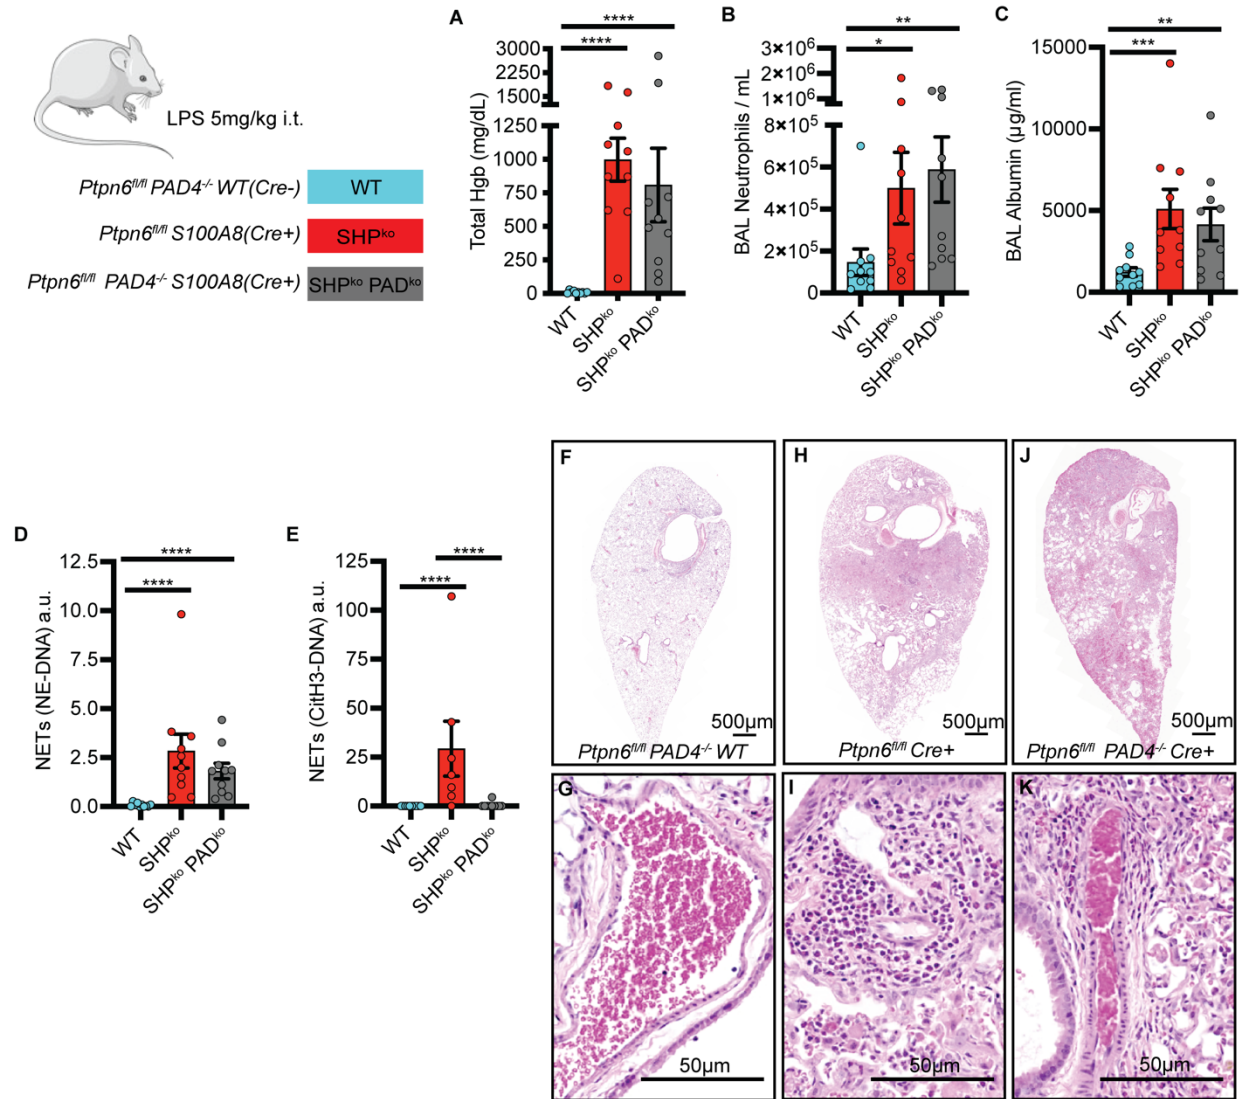

**Supplemental Figure 7. LPS-induced lung hyperinflammation in neutrophil Shp1 knockouts is independent of PAD4 expression.** (A) Alveolar hemorrhage, (B) BAL neutrophils, (C) BAL albumin, (D) and BAL NE-DNA NETs are unchanged in *Ptpn6<sup>fl/fl</sup> S100A8(Cre+)* vs. *Ptpn6<sup>fl/fl</sup> PAD4<sup>-/-</sup> S100A8(Cre+)* mice. (E) Expected reduction in CitH3-DNA complexes in *Ptpn6<sup>fl/fl</sup> PAD4<sup>-/-</sup> S100A8(Cre+)* mice. (F-K) H&E-stained lung tissue in (F-G) *Ptpn6<sup>fl/fl</sup>*, (H-I) *Ptpn6<sup>fl/fl</sup> S100A8(Cre+)*, (J-K) *Ptpn6<sup>fl/fl</sup> PAD4<sup>-/-</sup> S100A8(Cre+)* with similar lung injury in the *Ptpn6<sup>fl/fl</sup> S100A8(Cre+)* and *Ptpn6<sup>fl/fl</sup> PAD4<sup>-/-</sup> S100A8(Cre+)* and (I,K) perivascular inflammation. Log<sub>10</sub> transformed data were analyzed using one-way ANOVA with Tukey's test for multiple comparisons (A-E). \*\*\*\**p*<0.0001, \*\*\**p*<0.001, \*\**p*<0.01, \**p*<0.05. Scalebar = 50µm

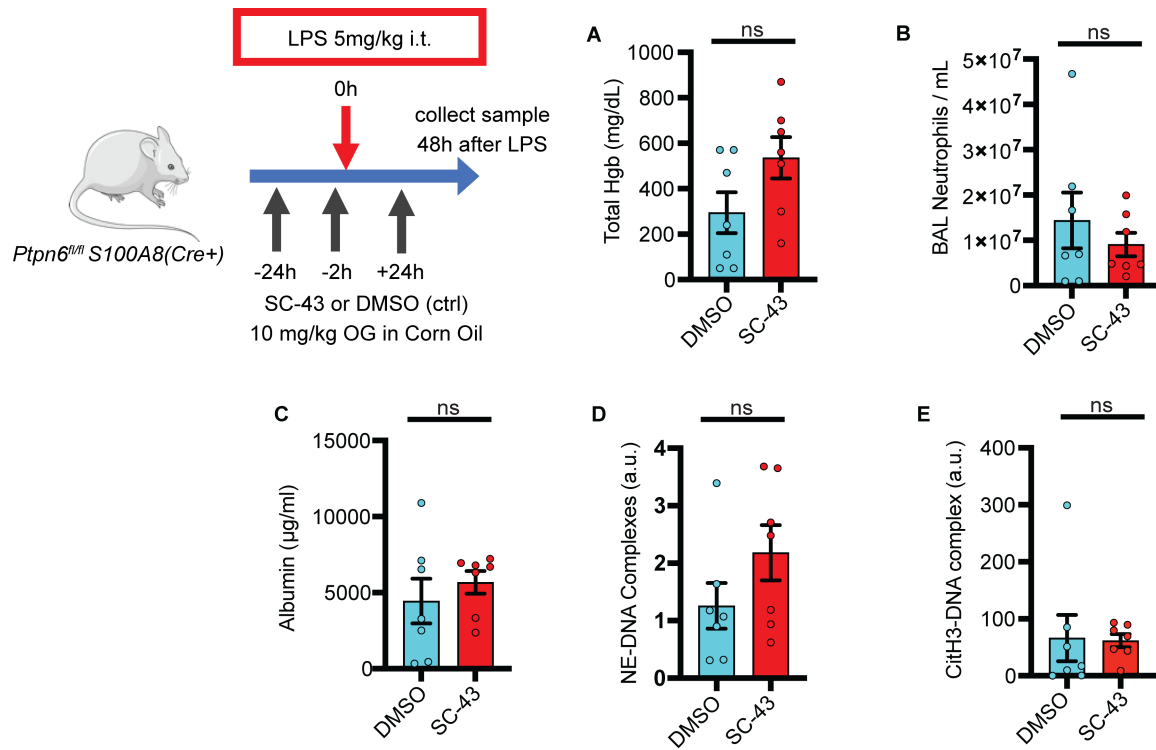

**Supplemental Figure 8. Shp1 activation with SC43 does not rescue pulmonary hemorrhage and hyperinflammation associated with the loss of neutrophil Shp1.** Similar (A) alveolar hemorrhage, (B) BAL neutrophils, (C) BAL albumin, (D) NE-DNA complexes, and (E) CitH3-DNA complexes in SC43 and DMSO (control) treated *Ptpn6<sup>fl/fl</sup> S100A8(Cre+)* mice after LPS challenge.



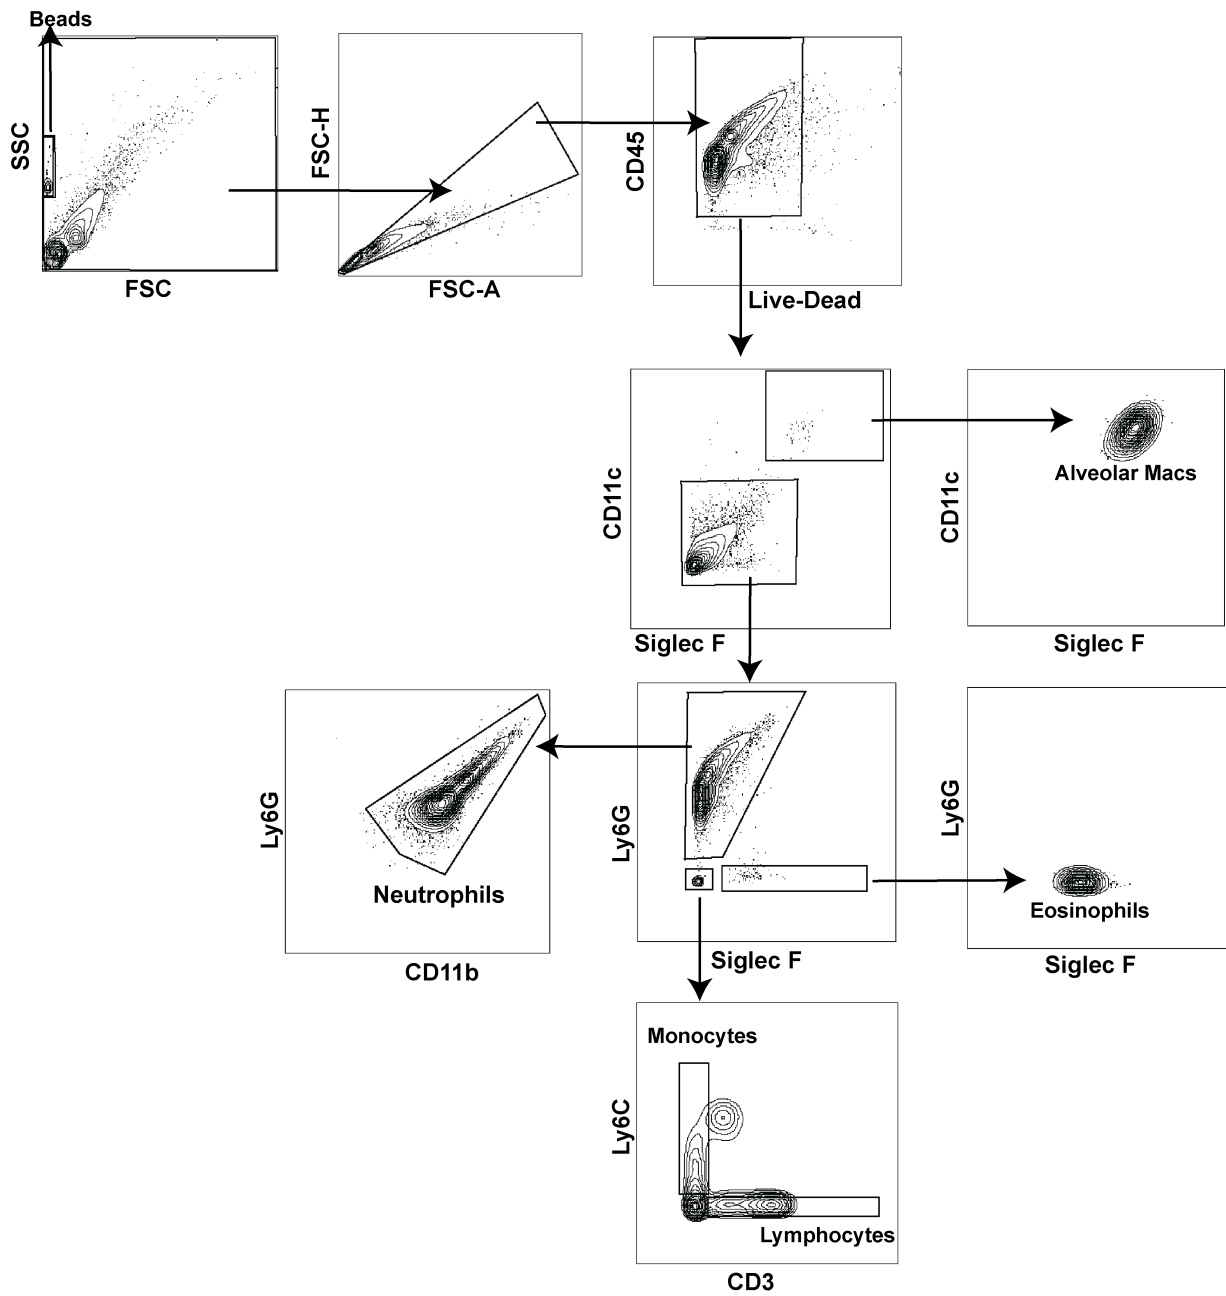

**Supplemental Figure 9.** Sample gating strategy for BAL collected for ALI experiments.
